# Supplementary material
Source: publisher figshare collection journal article supplement (https://acs.figshare.com/ndownloader/files/20182928)
Supplement: Supplementary file 1 [file 20182928]

---

## Supporting information

# Reduced Binding Energy and Layer-Dependent Exciton Dynamics in Monolayer and Multilayer WS<sub>2</sub>

*Yuanshuang Liu<sup>†</sup>, Xiangmin Hu<sup>†</sup>, Ting Wang<sup>†</sup> and Dameng Liu<sup>\*†</sup>*

<sup>†</sup>State Key Laboratory of Tribology, Tsinghua University, Beijing 100084, China

<sup>\*</sup>ldm@tsinghua.edu.cn

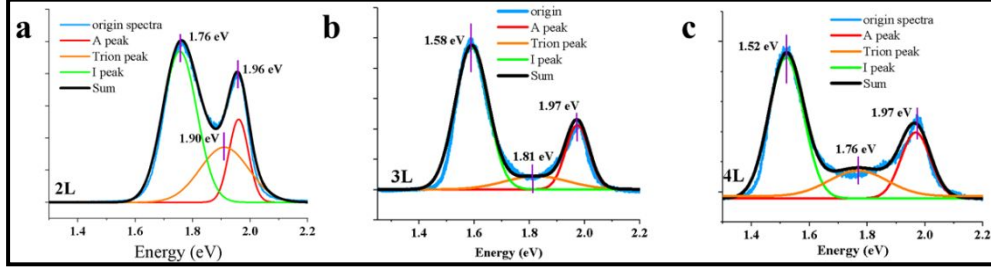

**Figure S1.** (a-c) show the PL spectra of 2L~4L WS<sub>2</sub> and their corresponding detailed fitted curves.

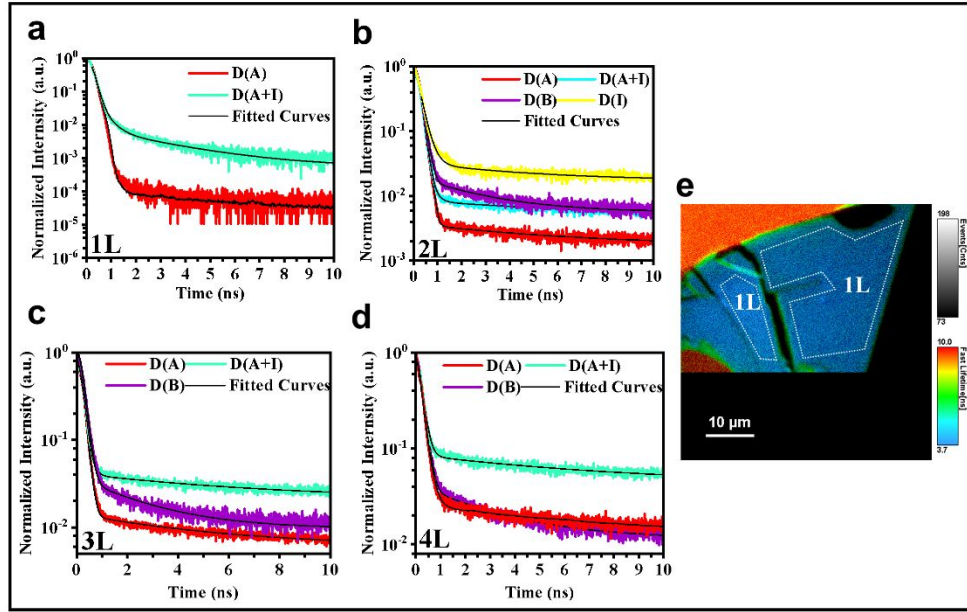

**Figure S2.** (a)-(d) compare the four decay curves, D(A), D(B), D(I) and D(A+I) in 1L~4L WS<sub>2</sub>. (e) FLIM image of ML WS<sub>2</sub>.
